## **The physical boundaries of public goods cooperation between surface-attached bacterial**

2 **cells**

4 Michael Weigert<sup>1,2,\*</sup> and Rolf Kümmerli<sup>1,\*</sup>

6 \* Corresponding authors

8 <sup>1</sup> Department of Plant- and Microbial Biology, University of Zurich, Winterthurerstrasse 190,  
8057 Zurich, Switzerland

10 <sup>2</sup> Microbiology, Department of Biology I, Ludwig Maximilians University Munich,  
Grosshaderner Strasse 2-4, Martinsried, 82152, Germany.

12 \* Correspondence address: Department of Plant- and Microbial Biology, University of  
Zurich, Winterthurerstrasse 190, 8057 Zurich, Switzerland. Tel: +41 44 635 2907; Fax: +41  
14 44 635 2920; E-mail: rolf.kuemmerli@uzh.ch, michael\_weigert@gmx.net

## 16 **Abstract**

18 Bacteria secrete a variety of compounds important for nutrient scavenging, competition  
20 mediation and infection establishment. While there is a general consensus that secreted  
22 compounds can be shared and therefore have social consequences for the bacterial collective,  
24 we know little about the physical limits of such bacterial social interactions. Here, we address  
26 this issue by studying the sharing of iron-scavenging siderophores between surface-attached  
28 microcolonies of the bacterium *Pseudomonas aeruginosa*. Using single-cell fluorescent  
microscopy, we show that siderophores, secreted by producers, quickly reach non-producers  
within a range of 100  $\mu\text{m}$ , and significantly boost their fitness. Producers in turn respond to  
variation in sharing efficiency by adjusting their pyoverdine investment levels. These social  
effects wane with larger cell-to-cell distances and on hard surfaces. Thus, our findings reveal  
the boundaries of compound sharing, and show that sharing is particularly relevant between  
nearby yet physically separated bacteria on soft surfaces, matching realistic natural conditions.

## 30 **Introduction**

31 The study of cooperative interactions in bacteria is of interdisciplinary interest, as it is relevant  
32 for understanding microbial community assembly (Leinweber et al. 2017; Jousset et al. 2013),  
the establishment of infections (Köhler et al. 2009; Alizon and Lion 2011; Pollitt et al. 2014) ,  
34 and biotechnological processes (Bachmann et al. 2016). Bacteria exhibit a wide range of  
cooperative traits, including the formation of biofilms and fruiting bodies, the secretion of  
36 toxins to infect hosts, coordinated swarming, and the scavenging of nutrients from the  
environment through the secretion of shareable compounds, such as enzymes and siderophores  
38 (West, Diggle, et al. 2007; Nadell et al. 2009). While the existing body of work has greatly  
changed our perception of bacteria – from simple autarkic individuals to sophisticated  
40 organisms, interacting and cooperating with each other – there are still considerable knowledge  
gaps. For instance, many of the insights gained on the sharing of public goods are based on  
42 experiments in planktonic batch cultures, where behavioural responses are averaged across  
millions of cells. This contrasts with the natural lifestyle of bacteria, where individual cells  
44 adhere to surfaces and form biofilms, and primarily interact with their immediate neighbours at  
the micrometre scale (Nadell and Bassler 2011; Drescher et al. 2014). The mismatch between  
46 laboratory and natural conditions has led to controversies in the field regarding the general  
relevance of microbial cooperation (Foster and Bell 2012; Zhang and Rainey 2013; Julou et al.  
48 2013).

50 In our paper, we tackle these issues by testing whether and to what extent, secreted siderophores  
are shared between surface-attached individuals of the bacterium *Pseudomonas aeruginosa*  
52 using fluorescent microscopy. Siderophores are secondary metabolites produced by bacteria to  
scavenge iron from the environment, where it typically occurs in its insoluble ferric form or is  
54 actively withheld by the host in the context of infections (Ratledge and Dover 2000; Miethke

and Marahiel 2007). In our experiments, we examined the production and secretion of  
56 pyoverdine, the main siderophore of *P. aeruginosa* (Visca et al. 2007), which has become a  
model trait to study cooperation in bacteria, because it fulfils all the criteria of a cooperative  
58 trait: it is costly to produce and secreted outside the cell, where it generates benefits in iron-  
limited media for the producer itself, but also for nearby individuals with a compatible receptor  
60 for uptake (Griffin et al. 2004; Buckling et al. 2007; Inglis et al. 2016). Although highly  
influential, many of the insights gained, are based on batch culture experiments, which tell us  
62 little about whether pyoverdine is also shared in surface-attached communities, where molecule  
diffusion might be limited, and thus the range of sharing constrained (Kümmerli, Gardner, et  
64 al. 2009; Julou et al. 2013). However, such knowledge is key to understand whether public  
goods cooperation occurs in natural settings and in infections, where bacteria typically live in  
66 biofilms attached to organic and inorganic substrates (Nadell et al. 2009; Flemming et al. 2016).

68 Here, we present data from fluorescence time-laps microscopy experiments that examined  
bacterial interactions in real time at the micrometer scale. First, we tested whether pyoverdine  
70 molecules, secreted by producing cells, reach individuals that cannot produce pyoverdine  
themselves but have the receptor for uptake. Such evidence would be a direct demonstration of  
72 cooperation. We addressed this question by making use of the auto-fluorescent properties of  
pyoverdine, which enables us to quantify the amount of pyoverdine that is actually taken up by  
74 non-producer cells. Second, we hypothesis that if pyoverdine is shared then it can serve as a  
signalling molecule (Lamont et al. 2002), and producers should thus respond to changes in their  
76 social neighbourhood. Specifically, we predict that lower pyoverdine investment is required in  
a cooperative neighbourhood due to the efficient reciprocal pyoverdine sharing between cells,  
78 whereas non-producers act as a sink for pyoverdine and should therefore trigger increased  
investment levels to compensate for the loss of pyoverdine (Kümmerli, Jiricny, et al. 2009; F

80 Harrison 2013b). To test this hypothesis, we used a strain with a fluorescent gene reporter fusion  
to follow plastic responses in pyoverdine investment over time. Third, we examined whether  
82 pyoverdine diffusivity limits the range across which pyoverdine can be efficiently shared. To  
this end, we manipulated both the media viscosity, which directly affects molecule diffusion,  
84 and the distance between producer and non-producer cells, which increases the diffusion time  
and possibly reduces the amount of pyoverdine reaching non-producers. Finally, we used time-  
86 laps microscopy to quantify fitness effects of pyoverdine production and sharing in growing  
micro-colonies. Taken together, our experiments shed light on the physical boundaries and  
88 individual fitness consequences of public goods sharing.

## 90 **Results**

### **Pyoverdine diffuses from producers to non-producers**

92 We put mono- and mixed cultures of the wildtype strain PAO1 (featuring a *pvdA*-gfp reporter  
fusion; see below) and its isogenic mutant PAO1 $\Delta$ *pvdD* (tagged with a fitness-neutral mCherry  
94 marker, Figure S1), deficient for pyoverdine production, on small iron-limited agarose pads on  
a sealed microscopy slide (see Material and Methods for details). Cultures were highly diluted  
96 such that single cells were physically separated from each another at the beginning of the  
experiment. We then monitored the pyoverdine fluorescence in growing micro-colonies over  
98 time for both strains under the microscope. Pyoverdine fluorescence is predominantly visible  
in the periplasma, where molecule maturation occurs and when it is not bound to iron (Julou et  
100 al. 2013; Schalk and Guillon 2013). We found that fluorescence in non-producer colonies was  
indistinguishable from background signal one hour after incubation, indicating that no  
102 detectable pyoverdine had yet been taken up (Figure 1A+C). However, pyoverdine  
fluorescence signal in non-producer cells significantly increased above background level in  
104 mixed cultures after three hours (LM:  $F_{5,7567} = 913$ ,  $p < 0.001$ ) and peaked after five hours (t-

test:  $t_{3945} = 79.33$ ,  $p < 0.001$ , Figure 1A+D). This demonstrates that significant amounts of  
106 pyoverdine diffuse from producer to non-producer microcolonies even when there is no direct  
cell-to-cell contact.

108

### **Producers adjust pyoverdine investment in the presence of non-producers**

110 To test whether producers respond to changes in their social environment, we followed the  
expression pattern of *pvdA* (a gene involved in pyoverdine synthesis) and natural pyoverdine  
112 fluorescence in growing producer microcolonies over time (Figure 2). In our control treatment  
with added iron, both *pvdA* and pyoverdine signal were significantly downregulated compared  
114 to iron-limited conditions, demonstrating the functioning and high sensitivity of our reporters.  
Under iron limitation, meanwhile, *pvdA*-expression was significantly higher in mixed compared  
116 to monoculture at one hour (t-test:  $t_{115} = 5.23$ ,  $p < 0.001$ ) and three hours ( $t_{860} = 13.92$ ,  $p <$   
 $0.001$ ) post-incubation (Figure 2A). Pyoverdine fluorescence mirrored *pvdA* expression  
118 patterns, with higher pyoverdine levels being detected in producer cells growing in mixed  
cultures (Figure 2B), although the difference was only significant after three hours (t-test:  $t_{992}$   
120  $= 13.30$ ,  $p < 0.001$ ), and not after one hour (t-test:  $t_{88} = 1.26$ ,  $p = 0.211$ ). The picture changed  
five hours post-incubation, where both *pvdA*-expression and pyoverdine fluorescence were  
122 significantly lower in mixed compared to monocultures (for *pvdA*-expression:  $t_{6441} = -16.67$ ,  $p$   
 $< 0.001$ , for pyoverdine fluorescence:  $t_{6017} = -50.01$ ,  $p < 0.001$ ). These analyses demonstrate  
124 that producers rapidly alter pyoverdine investment in response to the presence of non-producers,  
a pattern that can only be explained when pyoverdine is shared and is used as signal to perceive  
126 changes in the social environment.

128

### 130 **Pyoverdine non-producers outgrow producers in mixed cultures**

132 After having established that pyoverdine is shared between neighbouring, but physically separated surface-attached microcolonies, we explored the fitness consequences of pyoverdine sharing. This is important because experiments in shaken batch cultures repeatedly revealed 134 that non-producers can outcompete producers, as they do not pay the cost of pyoverdine production, yet still reap the benefits of the siderophores produced by others, a phenomenon 136 that is called “cheating” (Griffin et al. 2004; Freya Harrison et al. 2006; West, Griffin, et al. 2007; Kümmerli et al. 2010; Ghoul et al. 2014). Is cheating also possible when bacteria grow 138 as surface-attached microcolonies? To answer this question, we grew *mcherry*-tagged producers and *gfp*-tagged non-producers in mono and mixed culture and followed microcolony 140 growth dynamics over five hours (Figure 3). Control experiments in iron-supplemented media revealed that all strains grew equally well regardless of whether they grew in mono or mixed 142 cultures (Figure S2). In iron-limited media, however, we found that microcolonies of non-producers grew significantly slower (t-test:  $t_{23} = -10.57$ ,  $p < 0.001$ , Figure 3E) in monoculture 144 and to lower cell numbers ( $t_{23} = -10.27$ ,  $p < 0.001$ , Figure 3G) than microcolonies of producers. This shows that pyoverdine non-producers experience severe growth disadvantages when 146 grown alone, as they are unable to efficiently scavenge iron.

148 This fitness pattern diametrically flipped in mixed cultures, where non-producer microcolonies grew significantly faster ( $t_{35} = 2.64$ ,  $p = 0.012$ , Figure 3F) and to higher cell numbers ( $t_{31} = 2.48$ , 150  $p = 0.019$ , Figure 3H) than producer microcolonies. Intriguingly, non-producers experienced a relative fitness advantage between hours one and three (t-test:  $t_{20} = 4.53$ ,  $p < 0.001$ ), but not at 152 later time points ( $t_{22} = 4.46$ ,  $p < 0.001$ ; Figure S3). This specific period at which the relative fitness benefit manifests perfectly matches the timeframe during which producers exhibited 154 highest *pvdA* expression levels and non-producers started accumulating pyoverdine in the

periplasma (Figure 2). Our findings thus provide a direct temporal link between the high costs  
156 of pyoverdine investment to producers, the increased benefits accruing to non-producers, and  
the resulting opportunity for non-producers to act as cheaters and to successfully outcompete  
158 producers.

### 160 **The physical boundaries of pyoverdine sharing and benefits for non-producers**

The above experiments revealed that pyoverdine can be shared between two physically  
162 separated microcolonies when grown in the same field of view (128 x 96  $\mu\text{M}$ ) under the  
microscope (average  $\pm$  SD distance between cells in our experiments was  $36.2 \pm 18.2 \mu\text{M}$ ) .  
164 Next, we asked what the physical limit of pyoverdine sharing is. We thus repeated to above  
experiment, but this time we focussed on non-producer cells that had no producer cell within  
166 the same field of view, but only a more distant producer in an adjacent field of view (minimal  
distance  $\sim 100 \mu\text{M}$ ). When examining the number of doublings taking place over five hours,  
168 we found that non-producers benefited from the presence of more distant producers in the same  
way as they benefited from the presence of a close producer (Figure 4A+B; significantly  
170 increased growth of non-producers in mixed culture, t-test:  $t_{14} = 4.81$ ,  $p < 0.001$ ). However,  
contrary to the previous observation (Figure 4A), the producer in mixed culture no longer  
172 experienced a significant growth reduction when non-producers were further away (Figure 4B,  
 $t_{20} = -1.34$ ,  $p = 0.194$ ).

174

We then expanded the distance between non-producers and producers even further by adding  
176 the two strains on opposite ends of a double-sized agarose pad. In contrast to the previous  
results, these assays revealed that non-producers had significantly lower number of doublings  
178 in both mixed ( $t_{25} = -2.97$ ,  $p = 0.006$ ) and monocultures ( $t_7 = -4.11$ ,  $p = 0.004$ ) (Figure 4C),



showing that pyoverdine diffusion and sharing is disabled across this large distance in the  
180 timeframe analysed.

182 In addition, our microscopy experiment revealed that pyoverdine sharing did not only affect the  
doubling rate of cells but also their size (Figure 5). Specifically, while non-producer cells were  
184 significantly smaller than producer cells in monoculture (LM:  $F_{1,1294} = 150.90$ ,  $p < 0.001$ ,  
measured three hours post-incubation), the cell size of non-producers significantly increased  
186 when grown together with a nearby producing neighbour (same field of view:  $t_{446} = 10.24$ ,  $p <$   
 $0.001$ , Figure 5A; adjacent field of view:  $t_{161} = 4.10$ ,  $p < 0.001$ , Figure 5B), but not when  
188 producers were far away ( $t_{263} = 0.45$ ,  $p = 0.660$ , Figure 5C).

190 While the above experiments examined pyoverdine sharing on 1% agarose pads – a solid yet  
still moist environment – mimicking natural conditions as for instance encountered in moist  
192 soils or soft tissues in infections, we were wondering whether pyoverdine sharing is also  
possible on much harder and drier surfaces. To test this possibility, we repeated the growth  
194 experiments on 2% agarose pads. Under these conditions, we observed that non-producers no  
longer benefited from growing next to a producer (no significant difference in the number of  
196 doublings between mono and mixed culture:  $t_{14} = -0.40$ ,  $p = 0.693$ ) (Figure 6). This finding is  
compatible with the view that molecule diffusion is much reduced on very hard surfaces,  
198 preventing pyoverdine sharing between adjacent microcolonies.

## 200 **Discussion**

Our single-cell analysis on pyoverdine production in *P. aeruginosa* provides several novel  
202 insights on the social interaction dynamics between surface-attached bacteria. First, we found  
that pyoverdine secreted by producer cells is taken up by physically separated non-producer

204 cells, thereby directly demonstrating pyoverdine sharing. Second, we discovered that producer  
cells rapidly adjust pyoverdine expression levels when non-producers are nearby, by first up-  
206 regulating and then down-regulating pyoverdine investment. Third, we demonstrate that  
pyoverdine sharing has fitness consequences, as it boosts the growth and cell size of non-  
208 producers when growing in the vicinity of producers. Finally, we explored the physical limits  
of pyoverdine sharing and show that on soft surfaces, pyoverdine can be shared across a  
210 considerably large scale (at least 100  $\mu$ M, i.e. 50 times the length of a bacterium), whereas  
efficient sharing is impeded with larger distances between cells and on hard surfaces.  
212 Altogether, our experiments suggest that public goods sharing and exploitation can take place  
between surface-attached bacteria across a wide range of naturally relevant conditions, and is  
214 mediated by molecule diffusion without the need for direct cell-to-cell contact.

216 Our results oppose previous work claiming that pyoverdine is predominantly shared between  
adjacent cells within the same microcolony (Julou et al. 2013). This claim has provoked a  
218 controversy on whether pyoverdine, and secreted compounds in general, can indeed be regarded  
as public goods (Zhang and Rainey 2013; Kümmerli and Ross-Gillespie 2013). The difference  
220 between our experiments and the ones performed by Julou et al. (2013) is that their study solely  
examined pyoverdine content of cells within the same microcolony. Unlike in our study, there  
222 was no direct test of whether pyoverdine diffuses to neighbouring microcolonies and what the  
fitness consequences of such diffusion would be. While we agree that a considerable amount  
224 of pyoverdine is probably shared within the microcolony, we here demonstrate that a significant  
amount of this molecule also diffuses out of the microcolony, providing significant growth  
226 benefits to physically separated neighbouring microcolonies. Thus, our work concisely resolves  
the debate by showing that secreted hydrophilic compounds, such as pyoverdine (Kümmerli et  
228 al. 2014), can be considered as public goods, even in structured environments, with the amount

of sharing and the associated fitness consequences being dependent on the distance between  
230 neighbouring microcolonies. Moreover, the distance effect we report here at the single-cell  
level is in line with density effects described at the community level, where secreted compounds  
232 are predominantly shared and become exploitable at higher cell densities (i.e. when individual  
cells are presumably closer to one another Greig and Travisano 2004; Ross-Gillespie et al.  
234 2009; van Gestel et al. 2014; Scholz and Greenberg 2015).

236 A key advantage of single-cell analyses is that it allows the tracking of bacterial behavioural  
and growth changes in real time with high precision, immediately after the start of an  
238 experiment. This contrasts with batch culture experiments, where responses can only be  
measured after several hours, once the proxies for responses (e.g. optical density) become  
240 detectable at the community level. For instance, results from previous batch-culture studies  
suggest that pyoverdine producers seem to overinvest in pyoverdine when grown together with  
242 non-producers (Kümmerli, Jiricny, et al. 2009; Harrison 2013). However, the interpretation of  
these results based upon a number of assumptions, and the batch-culture approach precluded  
244 an in-depth analysis of the temporal pattern of such overinvestment and the associated fitness  
consequences. Our analysis now provides a nuanced view on the interactions between  
246 producers and non-producers. Specifically, we could show that soon after the inoculation of  
bacteria on the agarose pad, producers started overexpressing pyoverdine (Figure 2), which  
248 coincided with pyoverdine accumulation in non-producer cells (Figure 1), and significant  
fitness advantages to non-producers (Fig S3). Moreover, we discovered that producers can  
250 apparently respond to exploitation by non-producers by down-regulating pyoverdine  
production at later time points (between three and five hours), a response that correlated with  
252 the abolishment of further fitness advantages to non-producers. Thus, our results provide direct  
evidence for sophisticated regulatory responses to changes in the social environment, and

254 highlight that regulatory shifts and associated fitness consequences manifest much faster than  
previously thought.

256

Our considerations above raise questions regarding the regulatory mechanisms involved in  
258 controlling the observed expression changes. Molecular studies suggest that pyoverdine is not  
only a siderophore, but also serves as a signalling molecule regulating its own production  
260 (Beare et al. 2002; Lamont et al. 2002). Specifically, when iron-loaded pyoverdine binds to its  
cognate receptor FpvA, a signalling cascade is triggered, which results in the release of PvdS  
262 (the iron-starvation sigma factor, initially bound to the inner cell membrane by the anti-sigma  
factor FpvR). PvdS then upregulates pyoverdine production. This positive feedback, triggered  
264 by successful iron uptake, is opposed by a negative feedback operated by Fur (ferric uptake  
regulator), which silences pyoverdine synthesis once enough iron has been taken up (Ochsner  
266 and Vasil 1996; Visca et al. 2007). Our results can be interpreted in the light of these feedbacks,  
given that the relative strength of the opposing feedbacks determines the resulting pyoverdine  
268 investment levels (Weigert et al. 2017). When growing in monoculture, producer cells can  
efficiently share pyoverdine, which supposedly stimulates both pyoverdine-signalling and iron  
270 uptake. Positive and negative feedback should thus be in balance and result in an intermediate  
pyoverdine investment levels. Conversely, when producers grow in mixed cultures then non-  
272 producers serve as a sink for pyoverdine, and reduce iron supply to producers. In this scenario,  
the positive feedback should be stronger than the negative feedback, resulting in the  
274 upregulation of pyoverdine. While these elaborations are compatible with the pyoverdine  
expression patterns at hour one and three in our experiment, the flip in expression patterns  
276 between mono and mixed cultures observed after five hours is more difficult to explain. One  
option would be that the previously described switch from pyoverdine production to recycling  
278 (Faraldo-Gómez and Sansom 2003; Imperi et al. 2009; Kümmerli and Brown 2010) occurs

earlier in mixed than in monocultures. An alternative and more exciting option would be that  
280 producers can recognize the presence of exploitative cheaters and downscale their cooperative  
efforts accordingly.

282

Our results showing that non-producers can outcompete producers in mixed cultures, even  
284 when microcolonies are physically separated, confirms predictions from social evolution theory  
for microbes (Allison 2005; West et al. 2006; Driscoll and Pepper 2010; Dobay et al. 2014).

286 One key condition required for cooperation to be maintained is that cooperative acts must more  
often be directed towards other cooperators than expected by chance. This interaction  
288 probability is measured as the degree of relatedness  $r$ , a parameter central to inclusive fitness  
theory (Hamilton 1964; Frank 1998). Traditionally, high relatedness has been associated with  
290 the physical separation of cooperators and non-cooperators into distinct patches (Frank 1998).

Our results now show that this traditional view is not applicable to public goods cooperation in  
292 bacteria, because the physical separation of pyoverdine producer and non-producer colonies is  
insufficient to maintain cooperation and prevent exploitations by non-producers (Figure 3).

294 Clearly, relatedness in our scenario should be measured at the scale at which pyoverdine sharing  
can occur (West et al. 2006), which largely exceeds the boundaries of a single microcolony.

296 Thus, in scenarios where microbial cells are immobile, it is the diffusion properties of the public  
good that determines the degree of relatedness between interacting partners.

298

In summary, our finding on pyoverdine sharing and exploitation between physically separated  
300 microcolonies has broad implications for our understanding of the social life of bacteria in many  
natural settings. This is because bacteria typically live in surface-attached communities in  
302 aquatic and terrestrial ecosystems, as well as in infections (Nadell et al. 2009; Flemming et al.  
2016). Many of these natural habitats feature soft surfaces, as mimicked by our experimental

304 set up, making the diffusion and sharing of secreted compounds between cells highly likely.  
However, our work also revealed physical limits to public goods cooperation, namely on hard  
306 surfaces, where public good diffusion and sharing is impeded. This shows that whether or not  
a secreted compound is shared is context-dependent (Kümmerli et al. 2014), and relies, amongst  
308 other factors, on the physical properties of the environment.

## 310 **Materials and methods**

### **Strains and media**

312 Our experiments featured the clinical isolate *P. aeruginosa* PAO1 (ATCC 15692), and its clean  
deletion knock-out mutant of pyoverdine, directly derived from this wildtype (PAO1 $\Delta$ *pvdD*).  
314 To be able to distinguish the two strains under the microscope, we engineered fluorescent  
variants of these strains via chromosomal insertion (*attTn7::ptac-gfp*, *attTn7::ptac-mcherry*) –  
316 i.e. PAO1-*gfp*, PAO1-*mcherry*, PAO1 $\Delta$ *pvdD*-*gfp* and PAO1 $\Delta$ *pvdD*-*mcherry*. A preliminary  
experiment revealed that these fluorescent markers did not affect the growth performance of  
318 the strains (Figure S2). For our gene expression experiments, we used the reporter strain  
PAO1*pvdA-gfp* (chromosomal insertion: *attB::pvdA-gfp*) (Kaneko et al. 2007). PvdA catalyses  
320 an important step in the biosynthesis pathway of pyoverdine (Leoni et al. 1996), and its  
expression level is therefore a good proxy for the investment into pyoverdine production.

322

Overnight cultures were grown in 8 ml Lysogeny Broth (LB) medium in 50 ml Falcon tubes,  
324 and incubated at 37°C, 200 rpm for 16-18 hours. Cells were then harvested by centrifugation at  
3000 rpm for 3 minutes and resuspension in 8 ml of 0.8% NaCl (saline solution). For all  
326 experiments, we subsequently diluted the washed cultures in saline solution to an OD = 1  
(optical density at 600 nm). For all microscopy experiments, we used CAA medium (per liter:  
328 5 g casamino acids, 1.18 g K<sub>2</sub>HPO<sub>4</sub>\*3H<sub>2</sub>O, 0.25 g MgSO<sub>4</sub>\*7H<sub>2</sub>O, 450). To create severe iron

330 limitation, we added the chemical iron chelator 2,2-Bipyridin (final concentration 450  $\mu\text{M}$ ). To  
332 create iron-replete conditions, we added 200  $\mu\text{M}$   $\text{FeCl}_3$ . All chemicals were purchased from  
Sigma-Aldrich (Buchs SG, Switzerland).

### Preparation of microscopy slides

334 We adapted a method previously described in (de Jong et al. 2011). Standard microscopy slides  
(76 mm x 26 mm) were washed with EtOH and dried in a laminar flow. We used 65  $\mu\text{L}$  “Gene  
336 Frames” (Thermo Fisher Scientific) to prepare agarose pads. Each frame features a single  
chamber of 0.25 mm thickness (1.5 x 1.6 cm) and 65  $\mu\text{l}$  volume. The frame is coated with  
338 adhesives on both sides so that it sticks to the microscopy slide, and at the same time adheres  
the cover glass from the top. The sealed chamber is airtight, which is necessary to prevent  
340 evaporation and deformation of the pad during the experiment.

342 To prepare microscopy pads, we heated 20 mL CAA supplemented with agarose (1% unless  
indicated otherwise) in a microwave. The melted agarose-media mix was subsequently cooled  
344 to approximately 50°C. Next, we added the supplements: either 2,2-Bipyridin (final  
concentration 450  $\mu\text{M}$ ) or  $\text{FeCl}_3$  (final concentration 200  $\mu\text{M}$ ) to create iron-limited or iron-  
346 replete conditions, respectively. We pipetted 360  $\mu\text{L}$  of the agarose solution into the gene frame  
and immediately covered it with a cover glass. The cover glass was pressed down with a gentle  
348 pressure to dispose superfluous media. After the solidification of the agarose pad (ca. 30  
minutes), we removed the cover glass (by carefully sliding it sideways) and divided the original  
350 pad into 4 smaller pads of equal size by using a sterile scalpel. The further introduced channels  
between pads, which served as a reservoir for oxygen. We then put 1  $\mu\text{L}$  of highly diluted  
352 bacterial culture ( $\text{OD} = 1$  cultured diluted by  $2.5 \cdot 10^{-4}$ ) in the middle of each pad. Two pads  
were inoculated with a 1:1 mix of pyoverdine producers and non-producers, whereas the other

354 two pads were inoculated with a monoculture (either producer or non-producer). After the  
inoculum drop had evaporated, we sealed the pads with a new cover glass using the adhesive  
356 of the Gene Frame. With this protocol, we managed to create agarose pads with consistent  
properties across experiments.

358

### **Microscopy setup and imaging**

360 All experiments were carried out at the Center for Microscope and Image Analysis of the  
University Zürich (ZMB) using a widefield Leica DMI6000 microscope. The microscope  
362 featured a plan APO PH3 objective (NA = 1.3), an automated stage and an auto-focus. For  
fluorescent imaging, we used a Leica L5 filter cube for GFP (Emission:  $480 \pm 40$  nm,  
364 Excitation:  $527 \pm 30$  nm, DM = 505) and a Leica TX2 filter cube for mCherry (Emission:  $560$   
 $\pm 40$  nm, Excitation:  $645 \pm 75$  nm, DM = 595). Auto-fluorescence of pyoverdine was captured  
366 with a Leica CFP filter cube (Emission:  $436 \pm 20$  nm, Excitation:  $480 \pm 40$  nm, DM = 455). We  
used a Leica DFC 350 FX camera (resolution: 1392x1040 pixels) for image recording (16 bit  
368 colour depth).

### **Image processing and blank subtraction**

To extract information (cell size, fluorescence) from every single cell, images had first to be  
372 segmented. Segmentation is the process of dividing an image into objects and background.  
Since it is currently a bottleneck for high throughput image analysis (Van Valen et al. 2016),  
374 we developed a new workflow (detailed protocol available upon request). This workflow  
includes a protocol for the rapid, reliable and fully automated image segmentation without the  
376 need for any priors (i.e. information on cell size and shape) and manual corrections. The  
workflow starts with the machine learning, supervised object classification and segmentation  
378 tool ilastik (Sommer et al. 2011). Ilastik features a self-learning algorithm that autonomously



explores the parameter space for object recognition. We used a low number of phase contrast  
380 images from our experiments to train ilastik for bacterial cell recognition and segmentation.  
Each training round is followed by user inputs regarding segmentation errors. These inputs are  
382 then incorporated in the next training round, until segmentation is optimized and error-free.  
Once the training is completed, microscopy images from all experiments can be fed to ilastik  
384 and segmentation is then carried out in a fully automated manner, without the need for any  
further manual corrections. Ilastik produces binary images as an output (black background vs.  
386 white objects).

388 For image analysis, this output was then transferred to Fiji, a free scientific image processing  
software package (Schindelin et al. 2012). We wrote specific macro-scripts in Fiji to fully  
390 automate the simultaneous analysis of multiple single-cell features such as cell size, shape,  
fluorescence, etc. First, we used the binary images to create an overlay of the region of interests  
392 for every single cell, which could then be used in a second step to measure bacterial properties  
from phase contrast and fluorescence images (see supplementary material for a step-by-step  
394 protocol). Next, we applied a pixel-based blank correction procedure in Fiji, to obtain unbiased  
fluorescence intensities for each cell. For each agarose pad and time point, we imaged four  
396 empty random positions on the agarose pad without bacterial cells and averaged the grey values  
for each pixel. The averaged grey value of each pixel was then subtracted from the  
398 corresponding pixel position in images containing cells. This pixel-based blank correction  
accounts for intensity differences across the field of view caused by the optical properties of  
400 the microscope (vignetting). In the experiments where we simultaneously measured *pvdA-gfp*  
expression and pyoverdine fluorescence, we had to further correct for the leakage of pyoverdine  
402 signal into the GFP-channel. To do so, we imaged cells of the unmarked wildtype strain, which  
produced pyoverdine but had no GFP reporter. We then measured the pyoverdine signal in the

404 GFP-channel at three different time points (one, three and five hours post-incubation), and then  
used these values to blank correct the fluorescence intensities in cells with the *pvdA*-GFP  
406 reporter.

#### 408 **Assays measuring *pvdA* expression and pyoverdine fluorescence**

To monitor pyoverdine investment by producer cells and pyoverdine uptake by non-producer  
410 cells, we quantified natural pyoverdine fluorescence in bacterial micro-colonies of both strains  
in mixed and monocultures over time. For producer micro-colonies we further measured *pvdA*  
412 expression levels over time. Because the excitation wavelength for pyoverdine fluorescence  
overlaps with the UV range, the high exposure time required to measure natural pyoverdine  
414 fluorescence induces damage (i.e. phototoxicity) to bacterial cells. Accordingly, each bacterial  
micro-colony could only be measured once. To obtain time course data for pyoverdine  
416 expression and uptake levels, we thus prepared multiple microscopy slides, as described above,  
and incubated them at 37 °C in a static incubator. At each time step (one, three and five hours  
418 post incubation), we then processed two slides for imaging. Exposure time for measuring gfp-  
fluorescence was 800 ms and for pyoverdine 1500 ms, with a (halogen) lamp intensity of 100%.  
420 To guarantee reliable automated image analysis, we only considered positions that were free  
from non-bacterial objects (e.g. dust) and where all cells laid within one focus layer. Focus was  
422 adjusted manually. We recorded at least five positions per treatment, time point and slide. The  
experiment was carried out twice, in two completely independent batches.

424

#### **Fitness assays**

426 We used time-laps microscopy to measure the growth performance of pyoverdine producer  
cells (tagged with mCherry) and non-producer cells (tagged with GFP) in mixed and  
428 monoculture. As described above, we cut the agarose pad in four patches and inoculated two

patches with a 1:1 mix of producers and non-producers, and one patch each with a monoculture.

430 We then chose 20 positions (five per patch) that contained two separated cells (one cell of each  
strain for mixed cultures and two cells of the same type for monocultures), and imaged these  
432 positions sequentially every 15 minutes over 5 hours, using the automated stage function of the  
microscope. Following a position change and prior to imaging, we used the auto-focus function  
434 of the microscope to adjust the z-position in order to keep cells in focus. This protocol allowed  
us to follow the growth of micro-colonies from a single-cell stage.

436

We carried out the above fitness assays across a range of different conditions. In a control  
438 experiment, we added 200  $\mu\text{M}$   $\text{FeCl}_3$  to the agarose pad to study the strain growth in the absence  
of iron limitation. Since bacteria grow very well in iron-replete media, we stopped the imaging  
440 after three hours before micro-colonies started to grow in multiple layers. Next, we monitored  
strain growth on iron-limited 1% agarose pads supplemented with 450  $\mu\text{M}$  bipyridin. To  
442 examine whether pyoverdine sharing and fitness effects depend on the distance between two  
cells, we performed fitness assays where two cells were positioned: (i) close to one another in  
444 the same field of view (average distance between cells  $36.21 \mu\text{M} \pm 18.17 \text{SD}$ ); (ii) further apart  
in adjacent fields of view (with an estimated minimum distance of 96  $\mu\text{m}$ , given the field of  
446 view size of 96 x 128  $\mu\text{m}$ ); and (iii) far from one another. This latter condition was created by  
adding the two strains on opposite ends of an elongated double-sized agarose pad. Finally, we  
448 repeated the growth assays in media with increased viscosity (i.e. on 2 % agarose pads).

#### 450 **Statistical methods**

All statistical analyses were performed in R 3.3.0 (R Development Core Team 2015) using  
452 linear models (ANOVA or t-tests). Prior to analysis, we used the Shapiro-Wilk test to check  
whether model residuals were normally distributed. Since each experiment was carried out in

454 multiple independent experimental blocks, we scaled values within each block relative to the  
mean of the control treatment (i.e. pyoverdine producer grown in monoculture). For all time-  
456 laps growth experiments, we considered the position (i.e. the field of view) as the level of  
replication. This is justified because we chose positions on the same pad that were far apart to  
458 guarantee independence. For the analysis of single cell fluorescence data, we considered each  
cell as a replicate.

460

### **Acknowledgments**

462 We thank Urs Ziegler and Caroline Aemisegger for help with the microscope, Moritz  
Kirschmann for advice regarding single cell data analysis, and the SNSF (grant no.  
464 PP00P3\_165835 to RK), the ERC (grant no. 681295 to RK) and the DAAD (to MW) for  
funding.

466

### **Funding statement**

468 Funding organisations had no influence on study design, data collection and interpretation or  
the decision to submit the work for publication.

470

### **Data Archiving Statement**

472 Upon acceptance, raw data and scripts will be made available on Dryad.

### **Competing interests**

None declared.

476

478

## Contributions

480 Conception and design by MW and RK, Acquisition of data by MW, Analysis and  
482 interpretation of data by MW and RK, Drafting and revising the article by MW and RK.

484

484

## References

486 Alizon, S., S. Lion. 2011. Within-host parasite cooperation and the evolution of virulence.  
Proceedings of the Royal Society B: Biological Sciences 278: 3738–47.

488 Allison, S. D. 2005. Cheaters, diffusion and nutrients constrain decomposition by microbial  
enzymes in spatially structured environments. Ecology Letters 8: 626–35.

490 Bachmann, H., F. J. Bruggeman, D. Molenaar, F. Branco dos Santos, B. Teusink. 2016.  
Public goods and metabolic strategies. Current Opinion in Microbiology 31: 109–15.

492 Beare, P. A., R. J. For, L. W. Martin, I. L. Lamont. 2002. Siderophore-mediated cell  
signalling in *Pseudomonas aeruginosa*: divergent pathways regulate virulence factor

494 production and siderophore receptor synthesis. Molecular Microbiology 47: 195–207.

Buckling, A., F. Harrison, M. Vos, M. a Brockhurst, A. Gardner, S. a West, A. Griffin. 2007.

496 Siderophore-mediated cooperation and virulence in *Pseudomonas aeruginosa*. FEMS

Microbiology Ecology 62: 135–41.

498 de Jong, I. G., K. Beilharz, O. P. Kuipers, J.-W. Veening. 2011. Live cell imaging of *Bacillus*  
*subtilis* and *Streptococcus pneumoniae* using automated time-lapse microscopy. Journal of

500 Visualized Experiments, no. 53.

Dobay, A., H. C. Bagheri, A. Messina, R. Kümmerli, D. J. Rankin. 2014. Interaction effects

502 of cell diffusion, cell density and public goods properties on the evolution of cooperation in

- digital microbes. *Journal of Evolutionary Biology* 27: 1869–77.
- 504 Drescher, K., C. D. Nadell, H. A. Stone, N. S. Wingreen, B. L. Bassler. 2014. Solutions to the public goods dilemma in bacterial biofilms. *Current Biology* 24: 50–55.
- 506 Driscoll, W. W., J. W. Pepper. 2010. Theory for the evolution of diffusible external goods. *Evolution; International Journal of Organic Evolution* 64: 2682–87.
- 508 Faraldo-Gómez, J. D., M. S. P. Sansom. 2003. Acquisition of siderophores in Gram-negative bacteria. *Nature Reviews Molecular Cell Biology* 4: 105–16.
- 510 Flemming, H.-C., J. Wingender, U. Szewzyk, P. Steinberg, S. A. Rice, S. Kjelleberg. 2016. Biofilms: an emergent form of bacterial life. *Nature Reviews Microbiology* 14: 563–75.
- 512 Foster, K. R., T. Bell. 2012. Competition, not cooperation, dominates interactions among culturable microbial species. *Current Biology* : CB 22: 1845–50.
- 514 Frank, S. A. 1998. *Foundations of Social Evolution*. Princeton University Press
- Ghoul, M., S. A. West, S. P. Diggle, A. S. Griffin. 2014. An experimental test of whether
- 516 cheating is context dependent. *Journal of Evolutionary Biology* 27: 551–56.
- Greig, D., M. Travisano. 2004. The Prisoner’s Dilemma and polymorphism in yeast SUC
- 518 genes. *Proceedings of the Royal Society B: Biological Sciences* 271: S25–26.
- Griffin, A. S., S. A. West, A. Buckling. 2004. Cooperation and competition in pathogenic
- 520 bacteria. *Nature* 430.
- Hamilton, W. D. 1964. The genetical evolution of social behaviour. *Journal of Theoretical*
- 522 *Biology* 7: 1–52.
- Harrison, F. 2013a. Dynamic social behaviour in a bacterium: *Pseudomonas aeruginosa*

- 524 partially compensates for siderophore loss to cheats. *Journal of Evolutionary Biology* 26:  
1370–78.
- 526 Harrison, F. 2013b. Social versus nonsocial cues and responses: a reply to Alizon. *Journal of  
Evolutionary Biology* 26: 2297–98.
- 528 Harrison, F., L. E. Browning, M. Vos, A. Buckling. 2006. Cooperation and virulence in acute  
*Pseudomonas aeruginosa* infections. *BMC Biology* 4: 21.
- 530 Imperi, F., F. Tiburzi, P. Visca. 2009. Molecular basis of pyoverdine siderophore recycling in  
*Pseudomonas aeruginosa*. *Proceedings of the National Academy of Sciences of the United  
532 States of America* 106: 20440–45.
- Inglis, R. F., J. M. Biernaskie, A. Gardner, R. Kümmerli. 2016. Presence of a loner strain  
534 maintains cooperation and diversity in well-mixed bacterial communities. *Proceedings of the  
Royal Society B: Biological Sciences* 283: 20152682.
- 536 Jousset, A., N. Eisenhauer, E. Materne, S. Scheu. 2013. Evolutionary history predicts the  
stability of cooperation in microbial communities. *Nature Communications* 4: 2573.
- 538 Julou, T., T. Mora, L. Guillon, V. Croquette, I. J. Schalk, D. Bensimon, N. Desprat. 2013.  
Cell-cell contacts confine public goods diffusion inside *Pseudomonas aeruginosa* clonal  
540 microcolonies. *Proceedings of the National Academy of Sciences of the United States of  
America* 110: 12577–82.
- 542 Kaneko, Y., M. Thoendel, O. Olakanmi, B. E. Britigan, P. K. Singh. 2007. The transition  
metal gallium disrupts *Pseudomonas aeruginosa* iron metabolism and has antimicrobial and  
544 antibiofilm activity. *Journal of Clinical Investigation* 117: 877–88.
- Köhler, T., A. Buckling, C. van Delden. 2009. Cooperation and virulence of clinical

- 546 *Pseudomonas aeruginosa* populations. Proceedings of the National Academy of Sciences  
106: 6339–44.
- 548 Kümmerli, R., S. P. Brown. 2010. Molecular and regulatory properties of a public good shape  
the evolution of cooperation. Proceedings of the National Academy of Sciences of the United  
550 States of America 107: 18921–26.
- Kümmerli, R., A. Gardner, S. A. West, A. S. Griffin. 2009. Limited dispersal, budding  
552 dispersal, and cooperation: an experimental study. Evolution; International Journal of Organic  
Evolution 63: 939–49.
- 554 Kümmerli, R., N. Jiricny, L. S. Clarke, S. A. West, A. S. Griffin. 2009. Phenotypic plasticity  
of a cooperative behaviour in bacteria. Journal of Evolutionary Biology 22: 589–98.
- 556 Kümmerli, R., A. Ross-Gillespie. 2013. Explaining the Sociobiology of Pyoverdinin Producing  
*Pseudomonas*: a Comment on Zhang and Rainey (2013). Evolution; International Journal of  
558 Organic Evolution, 1–7.
- Kümmerli, R., K. T. Schiessl, T. Waldvogel, K. McNeill, M. Ackermann. 2014. Habitat  
560 structure and the evolution of diffusible siderophores in bacteria. Ecology Letters 17: 1536–  
44.
- 562 Kümmerli, R., P. van den Berg, A. Griffin, S. A. West, A. Gardner. 2010. Repression of  
competition favours cooperation: experimental evidence from bacteria. Journal of  
564 Evolutionary Biology 23: 699–706.
- Lamont, I. L., P. A. Beare, U. Ochsner, A. I. Vasil, M. L. Vasil. 2002. Siderophore-mediated  
566 signaling regulates virulence factor production in *Pseudomonas aeruginosa*. Proceedings of  
the National Academy of Sciences 99: 7072–77.



- 568 Leinweber, A., R. Fredrik Inglis, R. Kümmerli. 2017. Cheating fosters species co-existence in well-mixed bacterial communities. *The ISME Journal*, January.
- 570 Leoni, L., A. Ciervo, N. Orsi, P. Visca. 1996. Iron-regulated transcription of the *pvdA* gene in *Pseudomonas aeruginosa*: effect of Fur and PvdS on promoter activity. *Journal of Bacteriology* 178: 2299–2313.
- 572 Miethke, M., M. A. Marahiel. 2007. Siderophore-based iron acquisition and pathogen control. *Microbiology and Molecular Biology Reviews* 71: 413–51.
- 574 Nadell, C. D., B. L. Bassler. 2011. A fitness trade-off between local competition and dispersal in *Vibrio cholerae* biofilms. *Proceedings of the National Academy of Sciences of the United States of America* 108: 14181–85.
- 576 Nadell, C. D., J. B. Xavier, K. R. Foster. 2009. The sociobiology of biofilms. *FEMS Microbiology Reviews* 33: 206–24.
- 578 Ochsner, U. A., M. L. Vasil. 1996. Gene repression by the ferric uptake regulator in *Pseudomonas aeruginosa*: cycle selection of iron-regulated genes. *Proceedings of the National Academy of Sciences of the United States of America* 93: 4409–14.
- 580 Pollitt, E. J. G., S. A. West, S. A. Crusz, M. N. Burton-Chellew, S. P. Diggle. 2014. Cooperation, quorum sensing, and evolution of virulence in *Staphylococcus aureus*. *Infection and Immunity* 82: 1045–51.
- 584 R Development Core Team. 2015. R: A language and environment for statistical computing.
- 586 Ratledge, C., L. G. Dover. 2000. Iron metabolism in pathogenic bacteria. *Annual Review in Microbiology* 54: 881–941.

- Ross-Gillespie, A., A. Gardner, A. Buckling, S. A. West, A. S. Griffin. 2007. Frequency  
590 dependence and cooperation: theory and a test with bacteria. *The American Naturalist* 170:  
242–331.
- 592 Ross-Gillespie, A., A. Gardner, A. Buckling, S. A. West, A. S. Griffin. 2009. Density  
dependence and cooperation: theory and a test with bacteria. *Evolution; International Journal*  
594 *of Organic Evolution* 63: 2315–25.
- Schalk, I. J., L. Guillon. 2013. Fate of ferrisiderophores after import across bacterial outer  
596 membranes: different iron release strategies are observed in the cytoplasm or periplasm  
depending on the siderophore pathways. *Amino Acids* 44: 1267–77.
- 598 Schindelin, J., I. Arganda-Carreras, E. Frise, V. Kaynig, M. Longair, T. Pietzsch, S. Preibisch,  
et al. 2012. Fiji: an open-source platform for biological-image analysis. *Nature Methods* 9:  
600 676–82.
- Scholz, R. L., E. P. Greenberg. 2015. Sociality in *Escherichia coli*: Enterochelin Is a Private  
602 Good at Low Cell Density and Can Be Shared at High Cell Density. *Journal of Bacteriology*  
197: 2122–28.
- 604 Sommer, C., C. Strähle, U. Köthe, F. A. Hamprecht. 2011. Ilastik: Interactive Learning and  
Segmentation Toolkit. Eighth IEEE International Symposium on Biomedical Imaging (ISBI),  
606 230–33.
- van Gestel, J., F. J. Weissing, O. P. Kuipers, A. T. Kovács. 2014. Density of founder cells  
608 affects spatial pattern formation and cooperation in *Bacillus subtilis* biofilms. *The ISME*  
*Journal* 8: 2069–79.
- 610 Van Valen, D. A., T. Kudo, K. M. Lane, D. N. Macklin, N. T. Quach, M. M. DeFelice, I.

- Maayan, Y. Tanouchi, E. A. Ashley, M. W. Covert. 2016. Deep Learning Automates the  
612 Quantitative Analysis of Individual Cells in Live-Cell Imaging Experiments. PLOS  
Computational Biology 12: e1005177.
- 614 Visca, P., F. Imperi, I. L. Lamont. 2007. Pyoverdine siderophores: from biogenesis to  
biosignificance. Trends in Microbiology 15: 22–30.
- 616 Weigert, M., A. Ross-Gillespie, A. Leinweber, G. Pessi, S. P. Brown, R. Kümmerli. 2017.  
Manipulating virulence factor availability can have complex consequences for infections.  
618 Evolutionary Applications 10: 91–101.
- West, S. A., S. P. Diggle, A. Buckling, A. Gardner, A. S. Griffin. 2007. The Social Lives of  
620 Microbes. Annual Review of Ecology, Evolution, and Systematics 38: 53–77.
- West, S. A., A. S. Griffin, A. Gardner. 2007. Evolutionary Explanations for Cooperation.  
622 Current Biology 17: 661–72.
- West, S. A., A. S. Griffin, A. Gardner, S. P. Diggle. 2006. Social evolution theory for  
624 microorganisms. Nature Reviews Microbiology 4: 597–607.
- Zhang, X.-X., P. B. Rainey. 2013. Exploring the Sociobiology of Pyoverdine-Producing  
626 *Pseudomonas*. Evolution 67: 3161–74.

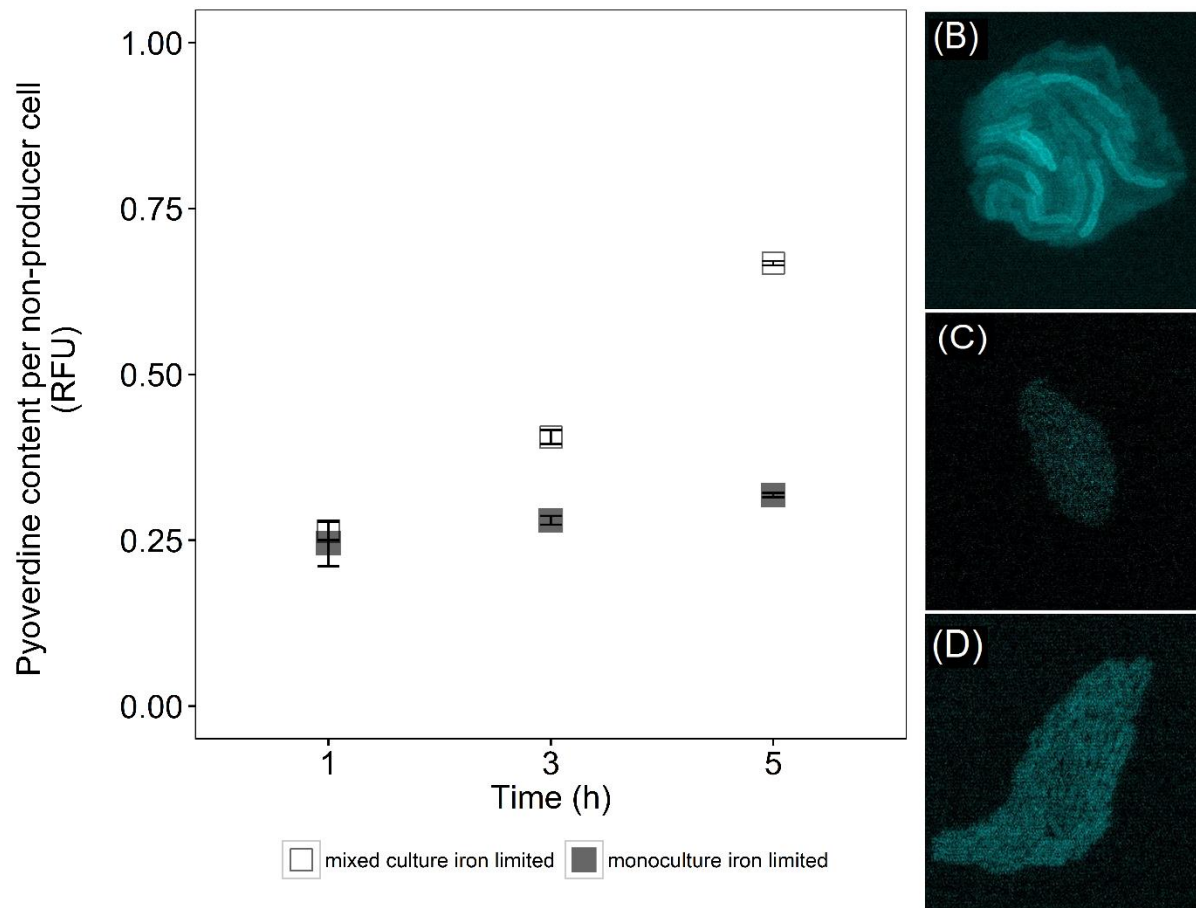

628

**Figure 1:** Pyoverdine is taken up by non-producing cells in a time-dependent manner, demonstrating  
630 pyoverdine sharing between physically separated, surface-attached micro-colonies. (A) Time-course  
632 measures on natural pyoverdine fluorescence units (RFU) shows constant background fluorescence in  
634 non-producer cells grown in monocultures (filled squares), whereas pyoverdine fluorescence  
636 significantly increased in non-producer cells grown in mixed cultures with producers (open squares).  
638 Mean relative fluorescence values  $\pm$  standard errors are scaled relative to producer monocultures after  
640 one hour of growth. Representative microscopy pictures show pyoverdine fluorescence in a producer  
642 microcolony from a mixed culture (B), a non-producer colony from a monoculture (C), and a non-  
producer colony from a mixed culture (D). Important to note is that only apo-pyoverdine (i.e. iron-free)  
is fluorescent, and therefore the measured fluorescence intensities represent a conservative measure of  
the actual pyoverdine content per cell. Furthermore, the fluorescence intensity in producer cells is  
always higher than in non-producer cells because it represents the sum of pyoverdine taken up from the  
environment and newly synthesized pyoverdine, whereas for non-producers, fluorescence represents  
pyoverdine uptake only.

644

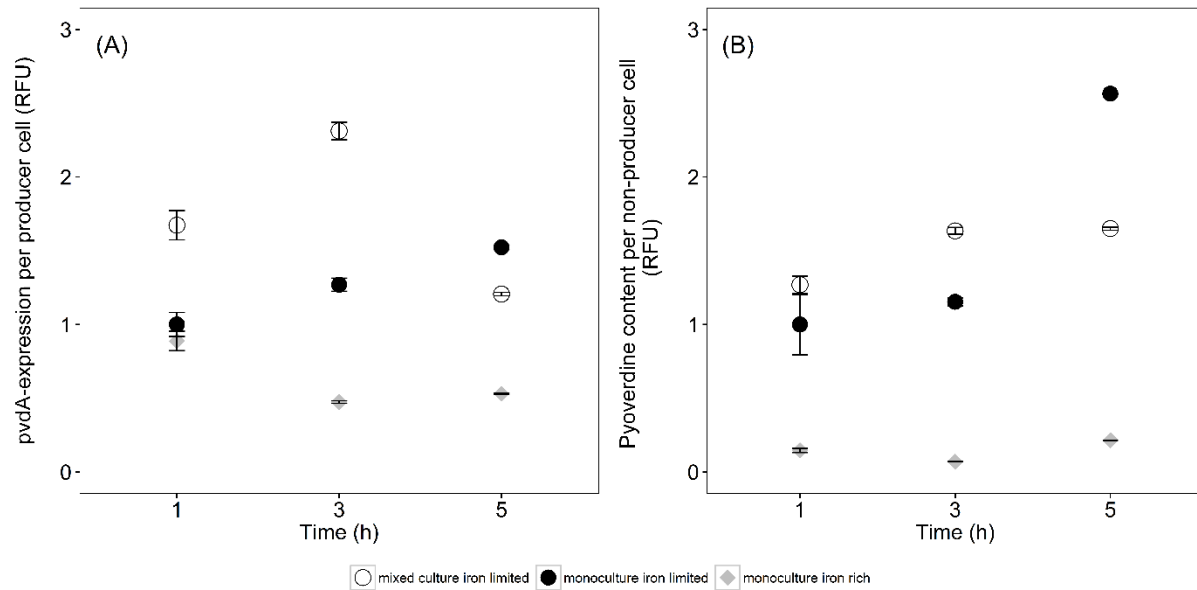

646

648

650

652

654

656

658

**Figure 2:** Producer cells adjust their pyoverdine investment level in response to changes in the social environment, supporting the view that pyoverdine is a shared signalling molecule in surface-attached microcolonies. **(A)** Time-course data show that *pvdA*, a gene encoding an enzyme involved in pyoverdine synthesis, is down-regulated in iron-rich media (grey diamonds), but up-regulated in iron-deplete media. Importantly, producers exhibited different *pvdA* expression patterns depending on whether they grew together with nonproducers (open circles) or as monoculture (filled circles). While producers showed increased gene expression in mixed compared to monoculture after one and three hours, the pattern flipped after five hours. **(B)** The same qualitative pattern was observed when measuring pyoverdine content per cell, as relative fluorescence units (RFU). Fluorescence values are scaled relative to the producer monocultures after one hour of growth. Important to note is that only apo-pyoverdine (i.e. iron-free) is fluorescent. Error bars indicate standard errors of the mean.

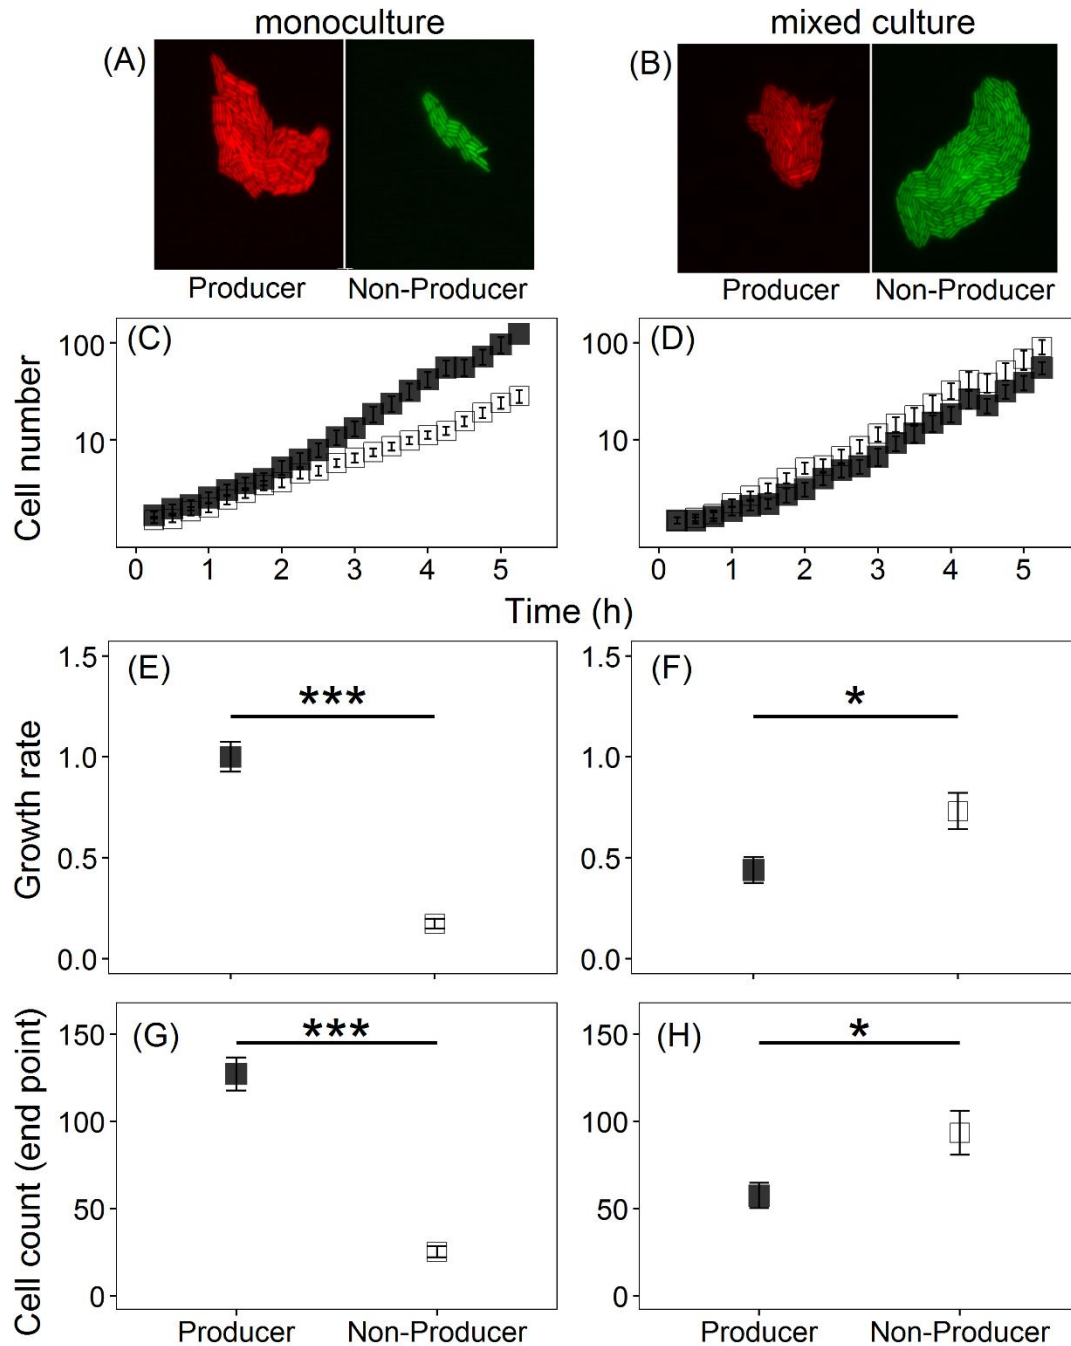

660

662 **Figure 3:** Growth performance of surface-attached microcolonies of pyoverdine producers (filled  
663 squares) and non-producers (open squares) in monocultures (left column) and mixed cultures (right  
664 column). While pyoverdine non-producers show growth deficiencies in monoculture, due to their  
665 inability to scavenge iron, they outcompete the producers in mixed cultures. This growth pattern shows  
666 that non-producers save costs by not making any pyoverdine, yet gain fitness benefits by capitalizing  
667 on the pyoverdine secreted by the producers. (A) and (B) show representative microscopy pictures for  
668 monocultures and mixed cultures, respectively. The overall growth trajectories of producers and non-  
669 producers differ substantially between monocultures (C) and mixed cultures (D). While producers had  
670 a significantly higher growth rate (E) and grew to higher cell numbers (G) in monocultures, the exact  
671 opposite was the case in mixed cultures for both the growth rate (F) and cell number (H). Growth  
672 parameters are given relative to the producers in monoculture. Asterisks indicate significant differences  
and error bars denote standard errors of the mean.

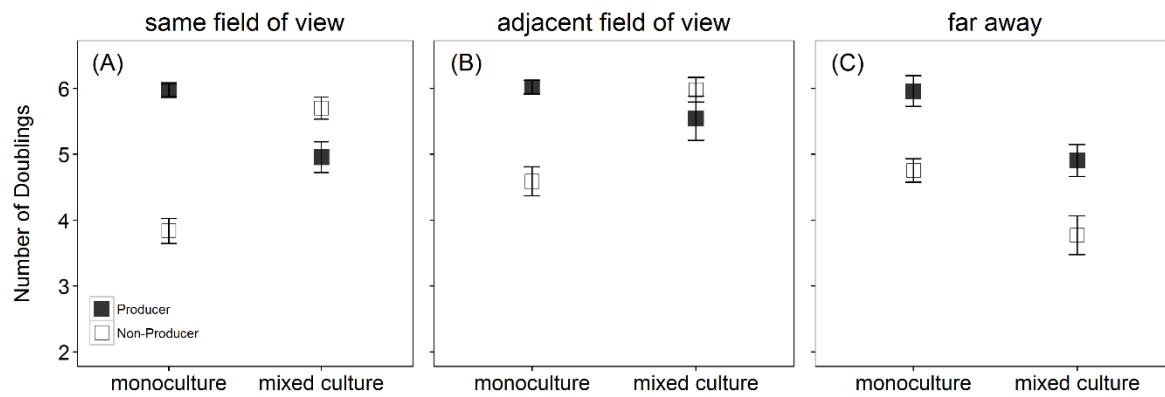

674

676 **Figure 4:** The relative fitness advantage of pyoverdine nonproducers in mixed cultures is dependent on  
678 the distance between producer (filled squares) and non-producer (open squares) microcolonies. In  
680 monoculture assays, the non-producers had significantly lower number of doublings than the producers  
682 in all experiments. In mixed cultures, meanwhile, the number of doublings of non-producers  
significantly increased when the producer microcolony was (A) within the same field of view (average  
distance between cells 36  $\mu\text{m}$ ), (B) in an adjacent field of view (minimal distance  $\sim 100 \mu\text{m}$ ), but not  
when producers were far away (on opposite ends of the agarose pad) (C). These analyses show that  
pyoverdine can be shared and exploited across a relative large distance (at least 100  $\mu\text{m}$ ). Error bars  
indicate the standard error of the mean.

684

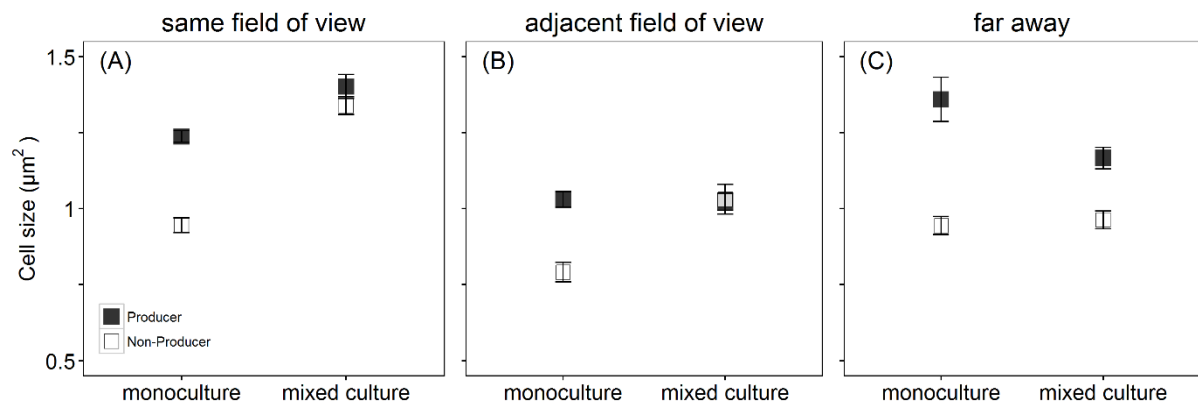

686 **Figure 5:** Pyoverdine sharing affects cell size. While non-producer cells (open squares) were  
688 significantly smaller than producer cells (closed squares) in monocultures, non-producer cell size was  
690 restored to wildtype level in mixed cultures when the producer microcolony was (A) within the same  
field of view (average distance between cells 36 µm), (B) in an adjacent field of view (minimal distance  
~ 100 µm), but not when producers were far away (on opposite ends of the agarose pad) (C). Cell size  
was measured after three hours of growth. Error bars indicate the standard error of the mean.

692



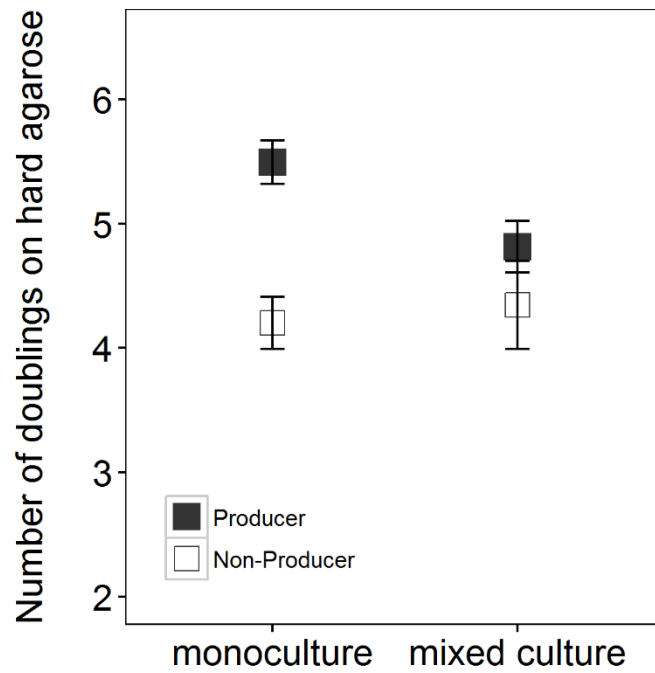

694

**Figure 6:** Pyoverdine sharing is impeded on hard surfaces. While the previous experiments showed that pyoverdine is extensively shared between neighbouring microcolonies on relatively soft surfaces (1 % agarose), efficient sharing was no longer possible on hard surfaces (2 % agarose). Under these latter conditions, non-producers (open squares) were significantly impaired in their growth even when being located next to producers. Error bars indicate the standard error of the mean.

700

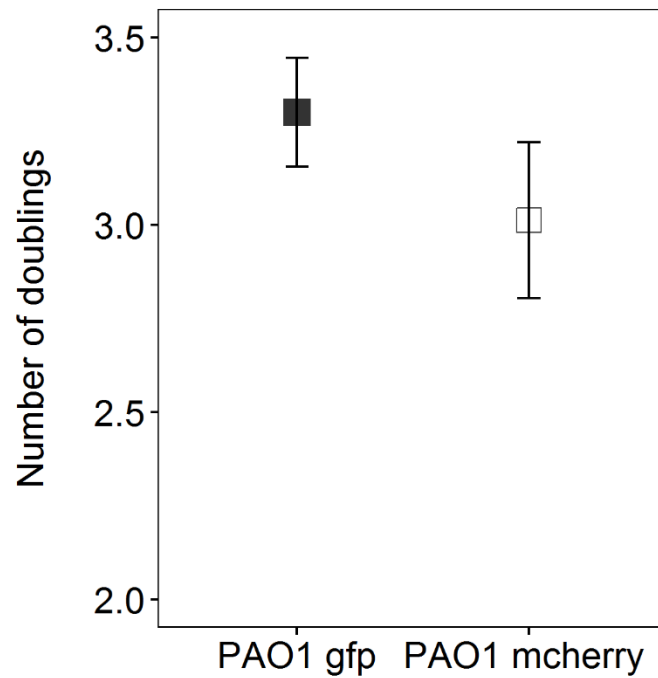

702

704

706

708

**Figure S 1:** Growth did not differ between strains tagged with GFP or mCherry. We grew the wildtype PAO1 strain, either tagged with GFP or mCherry on iron-limited agarose pads and calculated the number of doublings over 5 hours. Doubling numbers did not significantly differ between the two strains (t-test:  $t_{94} = 1.14$ ,  $p = 0.258$ ). Thus, we can be confident that growth differences observed in our experiments are due to biological and not tag effects. Symbols and error bars indicate means and standard errors of the mean, respectively.

710

712

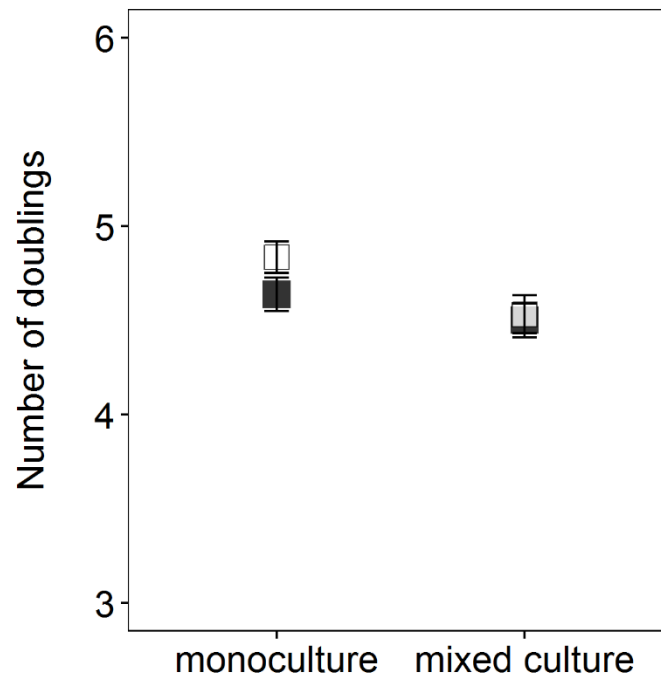

714 **Figure S 2:** There are no growth differences between the pyoverdine-producing strain (filled squares)  
716 and the non-producing strain (open squares) on agarose pads supplemented with 200  $\mu\text{M}$   $\text{FeCl}_3$ . Growth  
718 of the two strains was neither different in monoculture (t-test:  $t_{78} = -1.61$ ,  $p = 0.11$ ) nor in mixed culture  
720 (t-test:  $t_{71} = -0.23$ ,  $p = 0.82$ ). These results are in line with the view that pyoverdine production is  
722 completely stalled when iron is plentiful (Weigert et al. 2017), such that there is no more difference in  
of the strains' phenotype. This also means that the fitness effects we observed in iron-depleted media  
(Figures 3 - 6) are attributable to pyoverdine-mediated social interactions. The number of doublings was  
calculated over a growth period of 3 hours. Symbols and error bars indicate means and standard errors

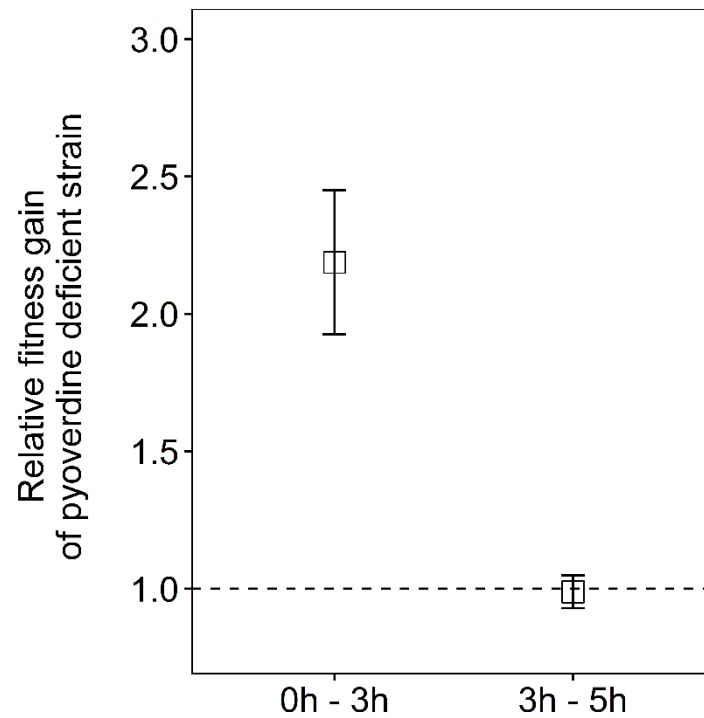

725 **Figure S 3:** Non-producers experience a significant relative fitness advantage during the first three  
hours of competition (zero to three hours; one sample t-test:  $t_{20} = 4.53$ ,  $p < 0.001$ ), but not during the  
later competition phase (three to five hours; one sample t-test:  $t_{41} = -0.18$ ,  $p = 0.85$ ). We used cell  
numbers to calculate strain frequencies at time point zero, three and five hours and to estimate the  
relative fitness of non-producers as  $v = [q_2(1 - q_1)]/[q_1(1 - q_2)]$ , where  $q_1$  and  $q_2$  are the initial and final  
730 frequencies of the non-producer (Ross-Gillespie et al. 2007). The dotted line represents the fitness  
equilibrium, where no strain has a relative fitness advantage over the other. Symbols and error bars  
indicate means and standard errors of the mean, respectively.
